1 **Low dose inocula of SARS-CoV-2 B.1.1.7 variant initiate more robust infections**  
2 **in the upper respiratory tract of hamsters than earlier D614G variants**

3  
4  
5  
6  
7  
8 Bobo Wing-Yee Mok<sup>1</sup>, Honglian Liu<sup>1</sup>, Siu-Ying Lau<sup>1</sup>, Shaofeng Deng<sup>1</sup>, Siwen Liu<sup>1</sup>,  
9 Rachel Chun-Yee Tam<sup>1</sup>, Timothy Ting-Leung Ng<sup>2</sup>, Jake Siu-Lun Leung<sup>2</sup>, Pui Wang<sup>1</sup>,  
10 Kelvin Kai-Wang To<sup>1</sup>, Jasper Fuk-Woo Chan<sup>1</sup>, Kwok-Hung Chan<sup>1</sup>, Kwok-Yung Yuen<sup>1</sup>,  
11 Gilman Kit-Hang Siu<sup>2</sup> and Honglin Chen<sup>1\*</sup>

12  
13 <sup>1</sup>Department of Microbiology and State Key Laboratory for Emerging Infectious  
14 Diseases, Li Ka Shing Faculty of Medicine, The University of Hong Kong, Hong Kong  
15 SAR, China.

16 <sup>2</sup>Department of Health Technology and Informatics, Faculty of Health and Social  
17 Sciences, The Hong Kong Polytechnic University, Hong Kong SAR, China

18  
19 \*Correspondence: hlchen@hku.hk  
20  
21  
22

23 **KEYWORDS: SARS-CoV-2, VOC, B.1.1.7, hamster infection model, replication fitness**

24  
25 **Abstract**  
26

27 There is a lack of experimental evidence to explain how the B.1.1.7 variant spreads  
28 more quickly than pre-existing variants in humans. We found that B.1.1.7 displays  
29 increased competitive fitness over earlier D614G lineages in an *in-vitro*  
30 system. Furthermore, , we demonstrated that B.1.1.7 variant is able to replicate and  
31 shed more efficiently in the nasal cavity than other variants with lower dose and shorter  
32 duration of exposure.

33

34

35 In late 2020, a novel SARS-CoV-2 variant of concern (VOC), VOC 202012/01 (lineage  
36 B.1.1.7) was identified in the United Kingdom. This B.1.1.7 variant containing multiple  
37 mutations in spike<sup>1</sup> has become dominant in the UK and is now rapidly spreading  
38 across multiple countries<sup>2</sup>. It is thought that this VOC has the potential to spread more  
39 quickly and with higher mortality than the pandemic to date<sup>3</sup>. Recently, using multiple  
40 behavioural and epidemiological data sources, Davies et al. estimated that the VOC  
41 202012/01 variant (lineage B.1.1.7) has a 43–90% higher reproduction number than  
42 pre-existing variants in England<sup>4</sup>. In another study, Davies et al. indicated that among  
43 specimens collected in the UK in early 2021, higher concentrations of virus were found  
44 on nasopharyngeal swabs from B.1.1.7 infected individuals, as measured by Ct values  
45 from PCR testing<sup>5</sup>. However, there is a lack of experimental evidence to support the  
46 expectation that B.1.1.7 does indeed spread more quickly than pre-existing variants.

47

48

49 The B.1.1.7 variant of SARS-CoV-2 harbours 21 non-synonymous point mutations and  
50 3 deletions in comparison to the reference genome (accession number:  
51 NC\_0.45512.2). Of these, 8 mutations and 2 deletions are involved in changes in the  
52 spike protein, which interacts with the host cell receptor, angiotensin-converting  
53 enzyme 2 (ACE2), and mediates virus entry into host cells<sup>6</sup>. These spike mutations  
54 include the deletion  $\Delta$ H69/ $\Delta$ V70, which has arisen in multiple independent lineages  
55 and is suggested to associate with increased infectivity and evasion of the immune  
56 response<sup>7</sup>; the mutation N501Y, which enhances binding affinity for the human ACE2  
57 receptor and therefore influences viral transmissibility<sup>8, 9</sup>; and the mutation P681H,  
58 which is adjacent to the S1/S2 furin cleavage site in spike and might have an impact  
59 on viral infectivity<sup>10, 11</sup>.

60

61

62 A recent study indicated that the SARS-CoV-2 VOC carrying the 501Y mutation  
63 showed no higher infectivity in cell than ancestral D614G variants<sup>12</sup>. Likewise, we did  
64 not observe replication of the B.1.1.7 variant to be significantly enhanced over that of  
65 other tested variants at any of the selected time-points in Vero-E6 and Calu-3 cells  
66 (Extended Data Fig. 1), however, we did observe that B.1.1.7 dominates in competitive  
67 fitness assays. These comparisons of replication fitness between B.1.1.7 and earlier  
68 circulating strains were performed in Calu-3 cells through simultaneous co-infection at

69 a 1:1 ratio with B.1.1.7 (accession number: MW856794) and another variant of the  
70 D614G lineage, either B.1-G (HK-95, accession number: MT835143) or B.1.GH (405,  
71 accession number: MW856793) (Fig. 1). After three rounds of consecutive passage at  
72 72-hour intervals, the B.1.1.7 variant became dominant in both co-culture conditions,  
73 suggesting that the additional substitutions in B.1.1.7 enhance SARS-CoV-2  
74 replication fitness in cells.

75

76 Next, we set up a Syrian hamster infection study to evaluate if B.1.1.7 exhibits higher  
77 infectivity *in vivo*. 6-8-week-old male Syrian hamsters were intranasally infected with  
78 50 microliters of different variants ( $2 \times 10^4$  PFU/ml), which is equivalent to 1000 PFU  
79 per inoculum, as indicated in Fig. 2A. Infectious viral titres in upper (nasal) and lower  
80 (pulmonary) tissues were measured on four consecutive days after infection. All  
81 viruses tested replicated to similar titres in nasal turbinate and lung tissues of infected  
82 hamsters. This result is consistent with two recent studies which also found no  
83 significant alteration in infectious viral titres in samples collected from nasal washes,  
84 throat swabs and lungs from hamsters infected with different SARS-CoV-2 variants<sup>13</sup>.  
85 <sup>14</sup>. Given that hamsters are highly susceptible to SARS-CoV-2 infection, intranasal  
86 infection with high-titre inocula may hamper discrimination of differences in the  
87 infectivity and replication efficiency of variants<sup>15</sup>. In fact, by titrating the infection  
88 dosage (10-fold dilution) of the inocula administered to hamsters, we observed that  
89 viral replication in nasal tissues of infected hamsters had already plateaued with  
90 infection doses of 100 PFU and upwards, even on day one post-infection (Extended  
91 data Fig. 2). Humans are exposed to varying doses of infectious particles during  
92 SARS-CoV-2 transmission. We reasoned that SARS-CoV-2 variants which can initiate  
93 effective infection with fewer infectious particles are likely to transmit more effectively  
94 than other variants requiring more infectious particles. To test this, we performed  
95 another hamster infection study using only 10 PFU per inoculum, with samples being  
96 collected at 16 hours post-infection. Interestingly, infectious viral loads in nasal  
97 turbinates of hamsters were found to be significantly higher with B.1.1.7 compared to  
98 the other viruses, whereas similar viral loads were observed in lungs of all infected  
99 hamsters, except for those inoculated with B.1-G (HK-95), which exhibits higher viral  
100 titres in lungs, although with large variations between replicates (Fig. 2B).

101

102 SARS-CoV-2 VOCs have been emerging in different countries in the past few months,  
103 and it is crucial to establish relevant experimental models to characterise existing and  
104 new variants in terms of transmissibility, disease severity and vaccine efficacy, and to  
105 evaluate therapeutic interventions. In this report, by using a lower infectious dose, we  
106 demonstrate that B.1.1.7 exhibits higher infectivity and/or replication efficiency in the  
107 nasal epithelium. Our data, albeit limited, strengthen the contention that this novel  
108 VOC is more easily transmitted than other pre-existing strains. Further work, including  
109 transmission studies with optimised inoculum dosages and timing of sample collection  
110 and investigation into routes of transmission are required. A better understanding of  
111 SARS-CoV-2 dynamics is important for designing combative strategies for the  
112 prevention and control of virus infections.

113

114

115

116 **References**

117

- 118 1. England, P.H. Investigation of novel SARS-CoV-2 Variants of Concern.  
119 [https://www.gov.uk/government/publications/investigation-of-novel-sars-cov-2-](https://www.gov.uk/government/publications/investigation-of-novel-sars-cov-2-variant-variant-of-concern-20201201)  
120 [variant-variant-of-concern-20201201](https://www.gov.uk/government/publications/investigation-of-novel-sars-cov-2-variant-variant-of-concern-20201201) (2020 ).  
121
- 122 2. O'Toole, A., Hill, V., Pybus, O.G. Tracking the international spread of SARS-  
123 CoV-2 lineages B.1.1.7 and B.1.351/501Y-V2. [https://virological.org/t/tracking-](https://virological.org/t/tracking-the-international-spread-of-sars-cov-2-lineages-b-1-1-7-and-b-1-351-501y-v2/592)  
124 [the-international-spread-of-sars-cov-2-lineages-b-1-1-7-and-b-1-351-501y-](https://virological.org/t/tracking-the-international-spread-of-sars-cov-2-lineages-b-1-1-7-and-b-1-351-501y-v2/592)  
125 [v2/592](https://virological.org/t/tracking-the-international-spread-of-sars-cov-2-lineages-b-1-1-7-and-b-1-351-501y-v2/592) (2021).  
126
- 127 3. Grint, D.J. *et al.* Case fatality risk of the SARS-CoV-2 variant of concern B.1.1.7  
128 in England. 2021.2003.2004.21252528 (2021).  
129
- 130 4. Davies, N.G. *et al.* Estimated transmissibility and impact of SARS-CoV-2  
131 lineage B.1.1.7 in England. *Science* (2021).  
132
- 133 5. Davies, N.G. *et al.* Increased mortality in community-tested cases of SARS-  
134 CoV-2 lineage B.1.1.7. *Nature* (2021).  
135
- 136 6. Starr, T.N. *et al.* Deep mutational scanning of SARS-CoV-2 receptor binding  
137 domain reveals constraints on folding and ACE2 binding. *bioRxiv* (2020).  
138
- 139 7. Kemp, S. *et al.* Recurrent emergence and transmission of a SARS-CoV-2 Spike  
140 deletion H69/V70. 2020.2012.2014.422555 (2021).  
141
- 142 8. Dejnirattisai, W. *et al.* The antigenic anatomy of SARS-CoV-2 receptor binding  
143 domain. *Cell* (2021).  
144
- 145 9. Tian, F. *et al.* Mutation N501Y in RBD of Spike Protein Strengthens the  
146 Interaction between COVID-19 and its Receptor ACE2.  
147 2021.2002.2014.431117 (2021).  
148
- 149 10. Hoffmann, M., Kleine-Weber, H. & Pohlmann, S. A Multibasic Cleavage Site in  
150 the Spike Protein of SARS-CoV-2 Is Essential for Infection of Human Lung Cells.  
151 *Mol Cell* **78**, 779-784 e775 (2020).  
152
- 153 11. Seyran, M. *et al.* The structural basis of accelerated host cell entry by SARS-  
154 CoV-2†. *Febs j* (2020).  
155
- 156 12. Li, Q. *et al.* SARS-CoV-2 501Y.V2 variants lack higher infectivity but do have  
157 immune escape. *Cell* (2021).  
158
- 159 13. Abdelnabi, R. *et al.* Comparative infectivity and pathogenesis of emerging  
160 SARS-CoV-2 variants in Syrian hamsters. 2021.2002.2026.433062 (2021).  
161
- 162 14. Mohandas, S. *et al.* Comparison of the pathogenicity and virus shedding of  
163 SARS CoV-2 VOC 202012/01 and D614G variant in hamster model.  
164 2021.2002.2025.432136 (2021).  
165

166  
167  
168  
169  
170  
171  
172  
173  
174  
175  
176  
177  
178  
179  
180  
181  
182  
183  
184  
185  
186

15. Imai, M. *et al.* Syrian hamsters as a small animal model for SARS-CoV-2 infection and countermeasure development. *Proc Natl Acad Sci U S A* **117**, 16587-16595 (2020).

### **Acknowledgments**

The authors would like to thank Dr Jane Rayner for critical reading and editing of the manuscript. This study is partly supported by the Theme-Based Research Scheme (T11/707/15) and General Research Fund (17107019) of the Research Grants Council, Hong Kong Special Administrative Region, China, and the Sanming Project of Medicine in Shenzhen, China (No. 290 SZSM201911014).

### **Declaration of interest statement**

No potential conflict of interest was reported by the author(s).

187 Figure 1. ***In-vitro* Competitive Fitness Assay**. Sanger sequencing chromatograms  
188 of spike gene fragments amplified from viral samples in the competition assay. Cell  
189 cultures were infected with a 1:1 mixture of two variants, as indicated, at an MOI of  
190 0.1. The supernatants were serially passaged three times in Calu-3 cells. 901 bp  
191 fragments containing residue 501 (boxed) were amplified from the vRNA of individual  
192 samples collected from each passage (P) and sequenced. B.1-G (HK-95) and B.1.GH  
193 (405) are 501N, B.1.1.7 is 501Y.

194

195

196 Figure 2. ***In-vivo* Infection Studies**. Viral replication of different SARS-CoV-2 variants  
197 in nasal turbinates and lungs of hamsters. Hamsters were infected with different  
198 SARS-CoV-2 variants, as indicated. Viral titers in nasal turbinates and lungs were  
199 determined by plaque assay (PFU/ml). (A) Hamsters (14 per variant virus group) were  
200 each inoculated intranasally with 50 ul of virus stock containing 1000 PFU of virus.  
201 Three to four hamsters from each group were euthanized on each of the four  
202 consecutive days following infection for viral titration. (B) Hamsters (4-5 per group)  
203 were each inoculated intranasally with 50 ul of virus stock containing 10 PFU of virus.  
204 One non-D614G lineage variant (HK-15 (MT835141)) and three D614G lineage  
205 variants (GH (405), B.1.1.7 and G (HK-95)) were used. Hamsters were euthanized at  
206 16 hours post-infection for viral titration. Horizontal lines indicate the overall mean of  
207 average viral titer values per group. Statistical significance was calculated by  
208 Student's t-test; \* denotes  $p < 0.05$ , \*\*\* denotes  $p < 0.0005$  and ns denotes *non-*  
209 *significant*.

210

211

212

213

214

215

216 **Figure 1**

217

**G (HK-95) vs B.1.1.7 (1:1)**

**AAT → TAT**  
**(N) → (Y)**

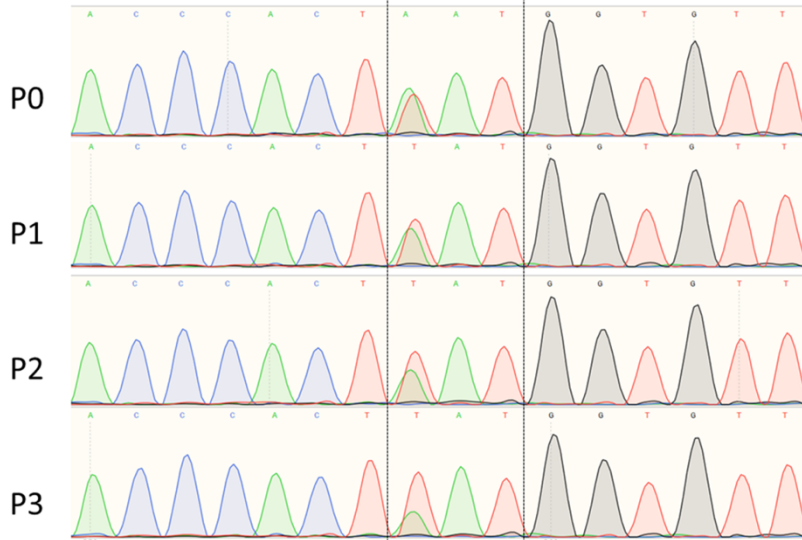

**GH (405) vs B.1.1.7 (1:1)**

**AAT → TAT**  
**(N) → (Y)**

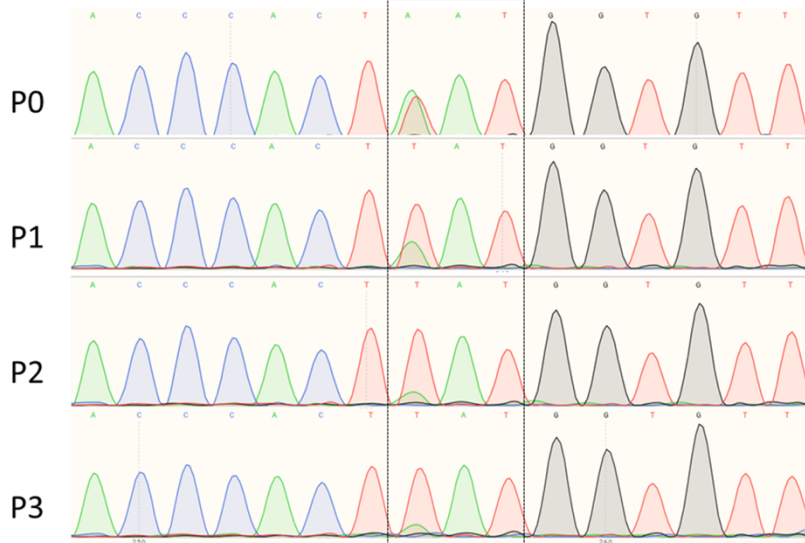

218

219



220 Figure 2

221

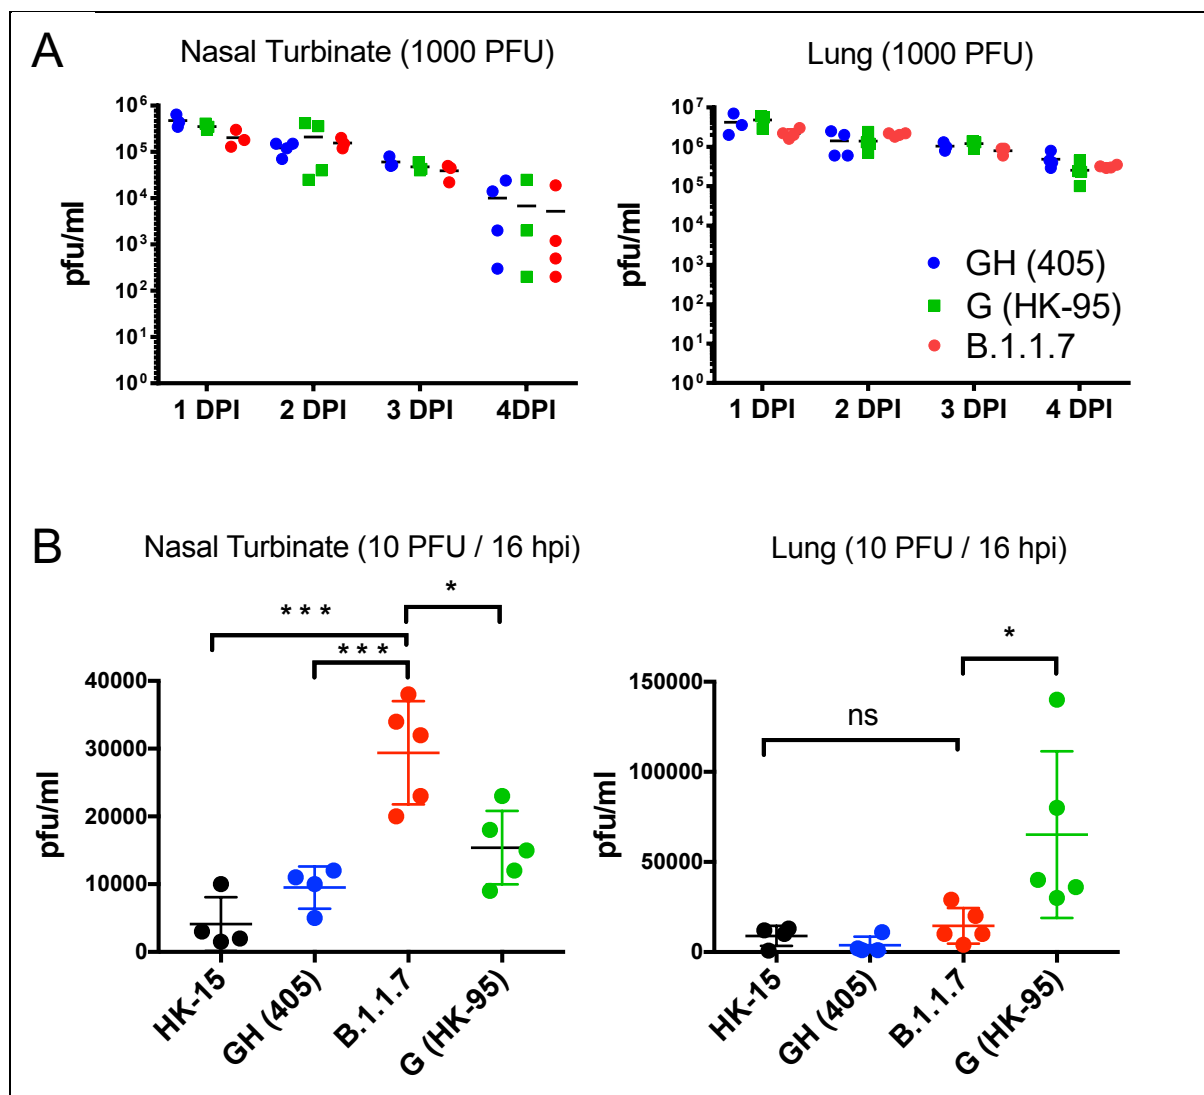

222

223

224

225

226 **Methods**

227

228 **Viruses**

229 The SARS-CoV-2 isolates HK-95 (MT835143), 405 (MW856793), B.1.1.7 (MW856794)  
230 and HK-15 (MT835141) were isolated from specimens obtained from four laboratory-  
231 confirmed COVID-19 patients using Vero E6 cells (ATCC; CRL-15786). All  
232 experiments involving SARS-CoV-2 viruses were conducted in a Biosafety Level-3  
233 laboratory. For animal challenge, viral stocks were prepared after two serial passages  
234 of isolated virus in Vero E6 cells in Dulbecco's Modified Eagle Medium (DMEM)  
235 (Thermo Fisher Scientific) supplemented with 5% fetal bovine serum (Thermo Fisher  
236 Scientific), and 100 IU penicillin G/ml and 100 ml streptomycin sulfate/ml (Thermo  
237 Fisher Scientific). Virus titres were then determined by plaque assay using Vero E6  
238 cells. Viral RNAs were obtained from the supernatants of infected cells and then  
239 isolated using the QIAamp RNA Viral kit (Qiagen) and subjected to whole viral genome  
240 sequencing.

241

242

243 **Hamster Infection**

244 Female golden Syrian hamsters, aged 6-8 weeks old, were obtained from the LASEC,  
245 Chinese University of Hong Kong via the Centre for Comparative Medicine Research  
246 at the University of Hong Kong (HKU). All experiments were performed in a Biosafety  
247 Level-3 animal facility at the LKS Faculty of Medicine, HKU. All animal studies were  
248 approved by the Committee on the Use of Live Animals in Teaching and Research,  
249 HKU. Hamsters were anesthetized with ketamine (150mg/kg) and xylazine (10 mg/mg)  
250 via intraperitoneal injection prior to nasal inoculation. All hamsters were euthanized  
251 by intraperitoneal injection of pentobarbital at 200 mg/kg.

252

253

254

255

256 ***In-vitro* Competitive Fitness Assay**

257

258 Calu-3 cells in Dulbecco's Modified Eagle Medium (DMEM) (Thermo Fisher Scientific)  
259 supplemented with 5% fetal bovine serum (Thermo Fisher Scientific), and 100 IU  
260 penicillin G/ml and 100 ml streptomycin sulfate/ml (Thermo Fisher Scientific) were  
261 infected with MOI of 0.1 of B.1.1.7 and another variant of the D614G lineage, either  
262 B.1-G (HK-95) or B.1.GH (405) mixture at 1:1 ratios. Following 1h incubation, the  
263 cultures were washed thrice with PBS and cultures for 3 days. To passage the progeny  
264 viruses, the virus samples were continuously passaged three times in Calu-3 cells.  
265 Viral RNAs were obtained from the supernatants of infected cells and then isolated  
266 using the QIAamp RNA Viral kit (Qiagen). A 901 bp fragment containing the N501Y  
267 site was amplified from each RNA sample by RT-PCR using primer set: 5'-  
268 GAAGTCAGACAAATCGCTCCAG-3' and 5'-GCAACTGAATTTTCTGCACCA-3'. The  
269 amplicon was purified by  
270 NucleoSpin® Gel and PCR Clean-Up (Takara) for Sanger sequencing.

271

272
